# Supplementary material
Source: PubMed Central journal article supplement (PMC1761972)
Supplement: plntphys_pp.106.087494_2.pdf [file plntphys_pp.106.087494_2.pdf]

**Suppl. Figure 2.** Top : List of maize  $\alpha$ -Expansins genes and putative genes studied with corresponding names, GB# of assembled ESTs and genomic DNA. Bottom : Alignment of translated sequences. ZmEXPA1 to ZmEXPA5 have been published and named by Wu et al 2001a.

| Deposited Name | Gene name | Genebank accession#                                                 |          |                            |                      | TIGR TC Contig member # | in silico specificity ? | full or partial genomic (d) |
|----------------|-----------|---------------------------------------------------------------------|----------|----------------------------|----------------------|-------------------------|-------------------------|-----------------------------|
|                |           | representative ESTs or ETG                                          | cDNA (a) | TIGR Contig / MAGI Contig  | TIGR Genomic DNA (c) |                         |                         |                             |
|                | ZmEXPA1   |                                                                     | AF332169 | TC300662                   | AZM5_10694           | 22                      | no                      | full                        |
|                | ZmEXPA2   |                                                                     | AF332170 | TC292884                   | AZM5_9655            | 16                      | no                      | full                        |
|                | ZmEXPA3   |                                                                     | AF332171 | TC305812                   | AZM5_84479           | 12                      | no                      | partial                     |
|                | ZmEXPA4   |                                                                     | AF332172 | TC292883                   | AZM5_9171            | 22                      | no                      | full                        |
|                | ZmEXPA5   |                                                                     | AF332173 | TC312134                   | AZM5_21648           | 21                      | no                      | full                        |
| ZmEXPA6        |           | DR824570                                                            |          | TC310902                   | lacking              | 54                      | pollen/anther           |                             |
| ZmEXPA7        |           | DV524240                                                            |          | TC310903                   | lacking              | 49                      | pollen/anther           |                             |
| ZmEXPA8        |           | CF009349                                                            |          | TC287543                   | AZM5_84998           | 46                      | pollen/anther           | full                        |
| ZmEXPA9        |           | BT016845                                                            |          | TC292888                   | AZM5_22176           | 28                      | no                      | full                        |
| ZmEXPA10       |           | DR967444                                                            |          | TC298364                   | AZM5_93913           | 27                      | no                      | partial                     |
| ZmEXPA11       |           | AY106266                                                            |          | TC292885                   | AZM5_9172            | 13                      | no                      | full                        |
| ZmEXPA12       |           | DT644592                                                            |          | TC298359                   | AZM5_26440           | 10                      | no                      | partial                     |
| ZmEXPA13       |           | DY532520                                                            |          | TC291600 /<br>MEC85804 (b) | AZM5_61641           | 4                       | no                      | full                        |
|                |           |                                                                     |          |                            |                      |                         |                         |                             |
|                |           | (a) published by Wu et al 2001 Plant Physiol                        |          |                            |                      |                         |                         |                             |
|                |           | (b) One TIGR contig with few members was completed by a MAGI contig |          |                            |                      |                         |                         |                             |
|                |           | (c) Blast search October 2006                                       |          |                            |                      |                         |                         |                             |
|                |           | (d) <i>partial</i> means that sequence extends beyond BAC end       |          |                            |                      |                         |                         |                             |

1 10 20 30 40 50 60 70 80 90 100 110 120

AF332169\_ZnEXPA1 MAAASALLLLLCSAFCSLAHRAGV-----DYGSMSAHATFYGGSDASGTMG-----GACGYGNM

AF332173\_ZnEXPA5 MALAGALLLLGL----LAREAAA-----GGMSAHATFYGGSDASGTMG-----GACGYGNL

AF332171\_ZnEXPA3 MKAATGSSSYSRALALLLAA--CLLWKEACF-----SASGLNKAFATFYGGSDASGTMG-----GACGYGNL

AF332172\_ZnEXPA4 MAAMPAPLLPLLLLVAARMTLSPAARIPGVYVGGGGGMSAHATFYGGSDASGTMGTYVHPMIHTHTYTYIQKRRLADETKGNLALQGACACGYGNL

TC292885\_ZnEXPA11 MAAMPALLL---LVATATAMFSPAARIPGVY--GGGMSAHATFYGGSDASGTMG-----GACGYGNL

AF332170\_ZnEXPA2 MAHRQAVLAAYVLAALFPLALSRGLGLVGHVVRPHTHGLGLGHHHSQPYPHGAPLAGGAWSSAHATFYGGSDASGTMG-----GACGYGNL

TC292888\_ZnEXPA9 TRRYHAG-----GACGYGNL

TC298364\_ZnEXPA10 MAPRLLLFLLLL--LPLLAGHQHPSSYGSSALSEWRPAKASY---YAADPEDAI-----GGACFGDL

TC298359\_ZnEXPA12 MAPLLLFLLLLPLLTALADGHQHLSSYGSSALSDWRPAKASY---YAADPEDAI-----GGACFGDL

MEC85804\_ZnEXPA13 STERRGEGGVSSLPSPVLLVYVYVLSAASFGGVGLDGGYEEHRLGTAPYVKEFQSHPLNDG-----GGACGYGDL

TC310902\_ZnEXPA6 MAGSMHAAPRPLLLSLLVAVLAVAADVANAGHAKPLTPGGRRVYVHMHGKF-----TAGPMKPAHATFYGGSDG--SGTT-----AGACGYKDT

TC310903\_ZnEXPA7 MAGSMHAAPRPLLLSLLVAVLAVAADVANAGHAKPLTPGGRRVYVHMHGKF-----TAGPMKPAHATFYGGSDG--SGTT-----AGACGYKDT

TC287543\_ZnEXPA8 MSGRSATIMAPLLASMLLVGLAVGSEEEEDGGGK-----KKPHVNHGKF-----KAEPHTDGHATYGGSDGLTDTTD-----GGACGYKGE

Consensus .....l..l.....w..ahAt%ygg.da....g. .GACG%gnl

121 130 140 150 160 170 180 190 200 210 220 230 240

AF332169\_ZnEXPA1 YSTGYGTNTAALSTALFNDGAAACGSCYELRCDD--NG-QSCLPGT--ITYTATNFCPPNYGLPSDD--GGCNPPrPHFDMAQPAFLQIAQYRAGIVPVYRVRVPCVKKGGIRFTINGHSY

AF332173\_ZnEXPA5 YSTGYGTNTAALSTALFNDGAAACGSCYELRCDD--DG-RMCLPGT--ITYTATNFCPPNYGLPSDD--GGCNPPrPHFDMAEPAFLRIAQYRAGIVPVAFRRVPCVKKGGIRFTINGHSY

AF332171\_ZnEXPA3 YSTGYGDTAALSTALFNDGASCGCYRISCDYQADP-RFCIRGT--SVTITATNLCPPNYALPND--GGCNPPrQHFDMAEPAWLKIGIYRGGIVPVYNYQRVPCVKKGGVRFVSINGRDY

AF332172\_ZnEXPA4 YSQGYGNNAALSTALFDEGLRCGACFEIRCEEQPGW-RMCRPGRPSILYATNFCPPNYALPSDD--GGCNPPrPHFDLAMPFLHIAEYRAGIVPVSYRRVPCRKSGGVRFITINGFRY

TC292885\_ZnEXPA11 YSQGYGNNAALSTALFNQGLSCGACFEIKCEDQPGW-RMCRPGSPSILYATNFCPPNYALPSDD--GGCNPPrPHFDLAMPFLHIAEYRAGIVPVYTYRRVPCRKSGGVRFITINGFRY

AF332170\_ZnEXPA2 YSQGYGTNTAALSTALFNGLSCGACFEYRCDAAGGGSHSCLPGS--VVYATNFCPPNNAALPSDD--GGCNPPrAHFDMSQPVFQRIALYRAGIVPVSYRRVACNKKGGIRFTINGHSY

TC292888\_ZnEXPA9 YSQGYGTNTAALSTALFNGLSCGACFEYRCDAAGGGGRSCLPGS--VVYATNFCPPNNAALPSDD--GGCNPPrAHFDMSQPVFQRIALYRAGIVPVSYRRVACNKKGGIRFTINGHSY

TC298364\_ZnEXPA10 GKHYGMATVGLSTALFERGAACGGCYEYKCVEDL---KYCLPGTSIVV-TATNFCPPNYGLPAD--AGGHCNPPrNHFLLPISQFEKIALWKAGIMPIQYRRVKCLREGGVRFVSNGRHF

TC298359\_ZnEXPA12 GKHYGMATVGLSTALFERGAACGGCYEYKCVEDL---KYCLPGTSIVV-TATNFCPPNYGLPAD--AGGHCNPPrNHFLLPISQFEKIALWKAGIMPIQYRRVKCLREGGVRFVSNGRHF

MEC85804\_ZnEXPA13 HIFGYGRYTAGLSAALFGRGGAACGGCYELRCVNHIT---QCLRGSPYVETATDFCPANMGLADDDAGGHCNPREHLELSEAFRLVAKAKAGIVPVQFRRVSCDRAGGMRFITGSAH

TC310902\_ZnEXPA6 RTQGYGVQTVAVSTVLFGDGTACGGCYEYRCVDSV---SGCKPDAALVVTVDLCPKDKQ-----HCKPPREHFDLSMPAFLQIAQEKAGIVPISYRRVACAKGGIRYITIGNKY

TC310903\_ZnEXPA7 RAQGYGVQTVAVSTVLFGDGTACGGCYEYRCVDSV---SGCKPSAALVVTVDLCPNDQ--QSADSGGHCNPPrEHFDLSMPAFLQIAQEKAGIVPISYRRVACTKGGIRYITIGNKY

TC287543\_ZnEXPA8 LGKDYGLTAAVGPSLYTNGTGGACCYELK---GP---KG-----TVVVTATNEAPPPVS-----GQKGEHFDLTIPAFKIAEEKAGIVPITYRKYACERKGGIRYITIGNQH

Consensus ys.yG..taalstaL%.G..CG.C%E.rc.....clpg...vvvTAT#fcpn..lp.dd.ggwnppr.Hfd\$.paFl.!A.yrAGIVP!.%RrV.C.k.GGIR%!ng..y

241 250 260 270 280 290 300 310 320 325

AF332169\_ZnEXPA1 FNLVLYTNVAGAGDVQSVSIKGSSTG-WQPHSRNMGQNMQSNLLDQQLSFQVTSADGRTYTSNGVAPAGWQFGQTFEGAQF

AF332173\_ZnEXPA5 FNLVLYTNVAGAGDVRSVYIRGSRGT-WQPHSRNMGQNMQSNLYLDRQALSFQVTSADGRTYTSNGVAPAGWQFGQTFEGGQF

AF332171\_ZnEXPA3 FELVLYSNVGGCGSISASIKGSRGT-WHAMS RNMGVNMQSNAYLNGQSLSFQVTSADGRTKTFPDVAPASWQFGQTFATSQQFS

AF332172\_ZnEXPA4 FNLVLYTNVAGAGDVVRASVKAASGT-WLPHSRNMGQNMQSNAILYQQLSFRVYTSADRTSTSNNAAPSTWQFGQTFEGKNFRV

TC292885\_ZnEXPA11 FNLVLYTNVAGAGDVVRASVKAASGTGEWPHSRNMGQNMQSNAILYQQLSFRVYTSADRTSTSNNAAPRDRWQFGQTFEGKNF

AF332170\_ZnEXPA2 FLVLYTNVAGAGDVHAYVYKASRGT-WLPHSRNMGQNMQSNLLDQQLSFRVYTSADGRTYTSNGVAPAGWQFGQTFEGAQF

TC292888\_ZnEXPA9 FNLVLYTNVAGAGDVHAYVYKASRGTWQALSRNMGQNMQSNLLDQQLSFRVYTSADGRTYTSNGVAPAGWQFGQTFEGAQF

TC298364\_ZnEXPA10 FFTVLYSNVGGAGDVRSVYKIKGTELG-WLPHGRNMGVYHINCDMRGQLSFELESDDSKLTSFNVPKDFEYKTYTGKQFL

TC298359\_ZnEXPA12 FFTVLYSNVGGAGDVRSVYKIKGTELG-WLPHGRNMGVYHINCDMRGQLSFELESDDGKALTSFNVPKDFEYKTYTGKQFL

MEC85804\_ZnEXPA13 FLVLYTNVAGAGDVHAYVYKASRGT-WLPHSRNMGQNMQSNLLDQQLSFEVYTGGRRTYTSNGVAPAGWQFGQTFEGAQF

TC310902\_ZnEXPA6 FNMVYITNVGGAGDIARVSVKGSKRVKHTMHRNMGVYQGTGEDLTCESLFRVYTSADHRKATSMHVLPADWQFGVYTYQASKNF

TC310903\_ZnEXPA7 FNMVYITNVGGAGDIARVSVKGSKRVKHTMHRNMGVYQGTGEDLTCESLFRVYTSADHRKATSMHVLPADWQFGVYTYQASKNF

TC287543\_ZnEXPA8 YSEVKVYTNVGGAGDVVALWVKNKRVKHTMHRNMGVYQGTGEDLTCESLFRVYTSADHRKATSMHVLPADWQFGVYTYQASKNF

Consensus %nlyl!tNVggaG#!.av.!Kgs..g.W.p\$SRnMGQNMqsn..\$.LsFrvt.sdgrt.ts..vaP.dW.FgqT%.g.qf..
