# Supplementary material
Source: PubMed Central journal article supplement (PMC1761972)
Supplement: plntphys_pp.106.087494_3.pdf [file plntphys_pp.106.087494_3.pdf]

**Suppl. Fig 3.** Top : List of maize  $\beta$ -Expansins genes and putative genes studied with corresponding names, GB# of assembled ESTs and genomic DNA. Bottom : Aligement of translated sequences. ZmEXPB1 to ZmEXPB11 have been published and named by Wu et al 2001a and Li et al 2003a.

| Deposited name | Gene name | Genebank accession#                                                         |          |              |                      | TIGR TC Contig member # | in sillico specificity ? | full or partial genomic |
|----------------|-----------|-----------------------------------------------------------------------------|----------|--------------|----------------------|-------------------------|--------------------------|-------------------------|
|                |           | representative ESTs or ETG                                                  | cDNA (a) | TIGR Contig  | TIGR Genomic DNA (c) |                         |                          |                         |
|                | ZmEXPB1   |                                                                             | AF332174 | TC279802     | AZM5_12008           | 108                     | pollen/anther            | full                    |
|                | ZmEXPB2   |                                                                             | AF332175 | TC310573     | AZM5_9615            | 48                      | no                       | full                    |
|                | ZmEXPB3   |                                                                             | AF332176 | TC310577     | AZM5_9614            | 21                      | no                       | full                    |
|                | ZmEXPB4   |                                                                             | AF332177 | TC288029     | AZM5_7010            | 28                      | no                       | partial                 |
|                | ZmEXPB5   |                                                                             | AF332178 | TC280518     | AZM5_2613            | 13                      | no                       | full                    |
|                | ZmEXPB6   |                                                                             | AF332179 | TC305980     | AZM5_9616            | 15                      | no                       | full                    |
|                | ZmEXPB7   |                                                                             | AF332180 | TC280517     | AZM5_2612            | 17                      | no                       | full                    |
|                | ZmEXPB8   |                                                                             | AF332181 | TC310570     | AZM5_9612            | 28                      | no                       | partial                 |
|                | ZmEXPB9   |                                                                             | AY197352 | TC281284     | AZM5_010             | 35                      | pollen/anther            | partial                 |
|                | ZmEXPB10  |                                                                             | AY104125 | TC292647     | AZM5_126156          | 103                     | pollen/anther            | partial                 |
|                | ZmEXPB11  |                                                                             | AY104999 | TC292651     | AZM5_122131          | 20                      | no                       | partial                 |
| ZmEXPB12       |           | DV515050                                                                    |          | TC287648     | AZM5_7380            | 34                      | no                       | partial                 |
| ZmEXPB13       |           | DY400881                                                                    |          | TC280521     | AZM5_977             | 18                      | no                       | partial                 |
| ZmEXPB14       |           | BG320486                                                                    |          | TC280520     | AZM5_2611            | 14                      | no                       | full                    |
| ZmEXPB15       |           | DV031017                                                                    |          | TC311993     | AZM5_12097           | 13                      | no                       | full                    |
| ZmEXPB16       |           | DV503456                                                                    |          | TC289097     | AZM5_84662           | 11                      | no                       | partial                 |
| ZmEXPB17       |           | CA405004                                                                    |          | TC311991     | lacking              | 11                      | no                       |                         |
| ZmEXPB18       |           | BQ538460                                                                    |          | TC310578     | AZM5_9613            | 10                      | no                       | full                    |
| ZmEXPB19       |           | CF635809                                                                    |          | TC287642     | AZM5_88389           | 6                       | no                       | full                    |
| ZmEXPB20       |           | BM267903                                                                    |          | TC310589     | AZM5_89613           | 5                       | no                       | full                    |
| ZmEXPB21       |           | DV493220                                                                    |          | TC308480     | AZM5_17733           | 3                       | no                       | full                    |
| ZmEXPB22       |           | BG873846                                                                    |          | BG873846 (b) | AZM5_7658            | 1                       |                          | full                    |
|                |           |                                                                             |          |              |                      |                         |                          |                         |
|                |           | (a) published by Wu et al 2001 Plant Physiol or Li et al 2003 Plant Physiol |          |              |                      |                         |                          |                         |
|                |           | (b) singleton                                                               |          |              |                      |                         |                          |                         |
|                |           | (c) Blast search October 2006                                               |          |              |                      |                         |                          |                         |
|                |           | (d) <i>partial</i> means that sequence extends beyond BAC end               |          |              |                      |                         |                          |                         |

1 10 20 30 40 50 60 70 80 90 100 110 120 130  
AF332174\_ZnEXPB1 MGSLLVNIHVYVAVLALVYAGGSCGPPKVPVPPGNTITNYNGKLTARATYVGPNGAGAPDNGGACGIKN-VNLPYPSGHTACGN  
AY197352\_ZnEXPB9 MGSLLANNIHVYVAVLALVYVGGSCGPPKVPVPPGNTITNYNGKLTARATYVGPNGAGAPDNGGACGIKN-VNLPYPSGHTACGN  
AY104125\_ZnEXPB10 MAVNVRTMSSNRQVAVYVAVL VFLVYGGANGCAPPKVPVPPGNTITATYGDLDLAKATYVGPNGAGAPDNGGACGIKN-VNLPYPSGHTACGN  
AY104999\_ZnEXPB11 HTAVSYTMSLVRQVAVLAVFLVYGGANGCAPPKVPVPPGNTITATYGDLDLAKATYVGPNGAGAPDNGGACGIKN-VNLPYPSGHTACGN  
AF332175\_ZnEXPB2 MGSFSSLPAARALLVLLALLAGGACREARQDRAADAGA--EMFNTEARAVYVGPNGAGAPDNGGACGIKN-VNLPYPSGHTACGN  
AF332181\_ZnEXPB8 MRQHSFSPSRAARALLVLLALLAGGACREARQDRAADAGTGTENYASDAVYVGPNGAGAPDNGGACGIKN-VNLPYPSGHTACGN  
AF332176\_ZnEXPB3 HAVLWMMSSSLSSRAVRAARLLCLLVHAGSDGTRHNSNNGGSGSSSSKSHKGGGGRAHRAPTTSPYSPSPAGNNSSDDG-ALNARATYVGPNGAGAPDNGGACGIKN-VNLPYPSGHTACGN  
AF332178\_ZnEXPB5 MASTSSFKVLAALGALIFSLVLYGSCARPANFTASDFADPN-HEARATYVGPNGAGAPDNGGACGIKN-VNLPYPSGHTACGN  
AF332180\_ZnEXPB7 MATLSSKVALGAPLFLLLVTCGSCARPANFTASDFADPN-HEARATYVGPNGAGAPDNGGACGIKN-VNLPYPSGHTACGN  
TC280520\_ZnEXPB14 MAATSSSSSTVVALRALLFLLVTCGSCARPANFTASDFADPN-HEARATYVGPNGAGAPDNGGACGIKN-VNLPYPSGHTACGN  
TC280521\_ZnEXPB13 MSVQSKVVALGALIF--LVSYGSTRIVNFNASHITDTPY-HVAARATYVGPNGAGAPDNGGACGIKN-VNLPYPSGHTACGN  
AF332179\_ZnEXPB6 NATALSFKALALRALLSMY--VSGARRAQKRNATTA--SQDRSLLSYSSG-ALPAKATYVGPNGAGAPDNGGACGIKN-VNLPYPSGHTACGN  
TC310578\_ZnEXPB18 NATALSKCALAVARALLSVYSVYVYGARARQQPSHNSDSESSQDRSLLSYSSG-ALPAKATYVGPNGAGAPDNGGACGIKN-VNLPYPSGHTACGN  
AF332177\_ZnEXPB4 MAKLWTL--AAVYVLSLVSPITACRKLKPKPKPSYRRPKPKVYGSYRPPVARRNHTATPSPSYVYGGGLSGAGATYVGPNGAGAPDNGGACGIKN-VNLPYPSGHTACGN  
TC287648\_ZnEXPB12 MAKSYTLLF-VALLVLLVSPITACSRKLAKP-NKP-----KPTHKPA-----ARVTPGSNHTDIPAVS--RAYGSGGALS-AGATYVGPNGAGAPDNGGACGIKN-VNLPYPSGHTACGN  
TC287642\_ZnEXPB19 MAKSCITLLFGTVLVLLLLVSPITACSRKLAKPTNKH-----RPHKPA-----A-VRRASNHTATPVS--DAYGSGGALS-AGATYVGPNGAGAPDNGGACGIKN-VNLPYPSGHTACGN  
TC311993\_ZnEXPB15 MATKYLRCFVLAARVACLRLRPGNPF-ELHRLKSGSDGAGATYVGPNGAGAPDNGGACGIKN-VNLPYPSGHTACGN  
TC289097\_ZnEXPB16 MASTLQLLSIATLALFFLHPCASTDEFHRELWGSNGI-ATYVGPNGAGAPDNGGACGIKN-VNLPYPSGHTACGN  
B6873846\_ZnEXPB22 RGPDDXGACGFKH-TNQYPPSHHTSCGN  
TC310589\_ZnEXPB20  
TC308380\_ZnEXPB21  
TC311991\_ZnEXPB17  
Consensus ..at.yg...gag.d..ggacg.....p...n...g.

131 140 150 160 170 180 190 200 210 220 230 240 250 260  
AF332174\_ZnEXPB1 VPIFKDGGKGCSCYEVRC--KEKPECSGNPVTYITDM---NYEPIAPYHFDLSGAFGSLAKPGLNOKLRHCIGDMVEFRVRYCKYPAAGQKLVFHEIEKGNPNYLAVLVYKVVADGDVLMETDQKL--  
AY197352\_ZnEXPB9 VPIFKDGGKGCSCYEVRC--KEKPECSGNPVTYITDM---NYEPIAPYHFDLSGAFGSLAKPGLNOKLRHCIGDMVEFRVRYCKYPAAGQKLVFHEIEKGNPNYLAVLVYKVVADGDVLMETDQKL--  
AY104125\_ZnEXPB10 VPIFKDGGKGCSCYEVRC--KEKPECSGNPVTYITDM---NYEPIAPYHFDLSGAFGSLAKPGLNOKLRHCIGDMVEFRVRYCKYPAAGQKLVFHEIEKGNPNYLAVLVYKVVADGDVLMETDQKL--  
AY104999\_ZnEXPB11 VPIFKDGGKGCSCYEVRC--KEKPECSGNPVTYITDM---NYEPIAPYHFDLSGAFGSLAKPGLNOKLRHCIGDMVEFRVRYCKYPAAGQKLVFHEIEKGNPNYLAVLVYKVVADGDVLMETDQKL--  
AF332175\_ZnEXPB2 QPLFKDGGKGCSCYQIRC--RKDPSCSGRTETVITDM---NYYPVSKYHFDLSGTAFGRALAKPGLNOKLRHSGIIEFTRVPCFFP--GLKIGFVVEEYSSPYFAVLYVEFDGGDGVVQVQLHEAKTA  
AF332181\_ZnEXPB8 QPLFKDGGKGCSCYQIRC--RKDPSCSGRTETVITDM---NYYPVSKYHFDLSGTAFGRALAKPGLNOKLRHSGIIEFTRVPCFFP--GLKIGFVVEEYSSPYFAVLYVEFDGGDGVVQVQLHEAKTA  
AF332176\_ZnEXPB3 EPIFKDGGKGCSCYQIRC--KAPACSGVAVETVITDM---NYYPVAPYHFDLSGTAFGRALAKPGLNOKLRHSGIIEFTRVPCFFP--GLKIGFVVEEYSSPYFAVLYVEFDGGDGVVQVQLHEAKTA  
AF332178\_ZnEXPB5 QPLFKDGGKGCSCYQIRC--QNHAPACSGNPETVITDM---NYYPVAKYHFDLSGTAFGRALAKPGLNOKLRHSGIIEFTRVPCFFP--GLKIGFVVEEYSSPYFAVLYVEFDGGDGVVQVQLHEAKTA  
AF332180\_ZnEXPB7 EPLFKDGGKGCSCYQIRC--QNHAPACSGNPETVITDM---NYYPVAKYHFDLSGTAFGRALAKPGLNOKLRHSGIIEFTRVPCFFP--GLKIGFVVEEYSSPYFAVLYVEFDGGDGVVQVQLHEAKTA  
TC280520\_ZnEXPB14 EPLFKDGGKGCSCYQIRC--QNHAPACSGNPETVITDM---NYYPVAKYHFDLSGTAFGRALAKPGLNOKLRHSGIIEFTRVPCFFP--GLKIGFVVEEYSSPYFAVLYVEFDGGDGVVQVQLHEAKTA  
TC280521\_ZnEXPB13 QPLFKDGGKGCSCYQIRC--VNHAPACSGNPETVITDM---NYYPVAKYHFDLSGTAFGRALAKPGLNOKLRHSGIIEFTRVPCFFP--GLKIGFVVEEYSSPYFAVLYVEFDGGDGVVQVQLHEAKTA  
AF332179\_ZnEXPB6 EPIFKDGGKGCSCYQIRC--KAPACSGVAVETVITDM---NYYPVAPYHFDLSGTAFGRALAKPGLNOKLRHSGIIEFTRVPCFFP--GLKIGFVVEEYSSPYFAVLYVEFDGGDGVVQVQLHEAKTA  
TC310578\_ZnEXPB18 EPIFKDGGKGCSCYQIRC--KAPACSGVAVETVITDM---NYYPVAPYHFDLSGTAFGRALAKPGLNOKLRHSGIIEFTRVPCFFP--GLKIGFVVEEYSSPYFAVLYVEFDGGDGVVQVQLHEAKTA  
AF332177\_ZnEXPB4 TPLVYRGGEGCAGCYEVK--TTNAAACSGQPVTYITDQSPGGLFPGVEYHFDMSGTAMGAMAPGNADRLRSRAGLTIQYKRVPCYKYS--GVNIATFVDDQGNPNFYFVLEVIEFDGGDGLSARVLMHEAG--  
TC287648\_ZnEXPB12 PSLFKDGGKGCSCYQIRC--DSNAPACSGPATVYITDPCPGVLAERAHFDMSGTSMGAMAPGNADRLRSRAGLTIQYKRVPCYKYS--GVNIATFVDDQGNPNFYFVLEVIEFDGGDGLSARVLMHEAG--  
TC287642\_ZnEXPB19 PSLFKDGGKGCSCYQIRC--DSNAPACSGPATVYITDPCPGVLAERAHFDMSGTSMGAMAPGNADRLRSRAGLTIQYKRVPCYKYS--GVNIATFVDDQGNPNFYFVLEVIEFDGGDGLSARVLMHEAG--  
TC311993\_ZnEXPB15 PSIFQNGKGCSCYQVVC--TGNHACSGSPVTYVITDPCPGVLAERAHFDMSGTSMGAMAPGNADRLRSRAGLTIQYKRVPCYKYS--GVNIATFVDDQGNPNFYFVLEVIEFDGGDGLSARVLMHEAG--  
TC289097\_ZnEXPB16 SSIYDSGKGCSCYQVVC--TGNHACSGSPVTYVITDPCPGVLAERAHFDMSGTSMGAMAPGNADRLRSRAGLTIQYKRVPCYKYS--GVNIATFVDDQGNPNFYFVLEVIEFDGGDGLSARVLMHEAG--  
B6873846\_ZnEXPB22 EPLFKDGGKGCSCYQIRC--KAPACSGVAVETVITDM---NYYPVAPYHFDLSGTAFGRALAKPGLNOKLRHSGIIEFTRVPCFFP--GLKIGFVVEEYSSPYFAVLYVEFDGGDGVVQVQLHEAKTA  
TC310589\_ZnEXPB20  
TC308380\_ZnEXPB21  
TC311991\_ZnEXPB17  
Consensus ...f..gkcgcy...c.....csg...v.itd.....p...ghfslgstafga#akp6...#.LR.a6iidi%#.RVpC..p G...!.F.!#.GsnpnYLAVLVYe%g.g#gd.v.v#n#....

261 270 280 290 300 310 320 330 340 350 360 370 377  
AF332174\_ZnEXPB1 ---SRAEKPKLSHGAIRKMDT---AKALKGPFSSIRL TSESGKVIKADVIPANRHPDVAVYTSNVQFY  
AY197352\_ZnEXPB9 ---SRAEKPKLSHGAIRKMDT---AKALKGPFSSIRL TSESGKVIKADVIPANRHPDVAVYTSNVQFY  
AY104125\_ZnEXPB10 ---SDTYELPKHSHGAIKRDSD---DKPLKGPLTVRL TTEGGTKSVYDDVIPANRHPDVAVYTSNVQFY  
AY104999\_ZnEXPB11 ---SDTYELPKHSHGAIKRDSD---DKPLKGPLTVRL TTEGGTKSVYDDVIPANRHPDVAVYTSNVQFY  
AF332175\_ZnEXPB2 RGPPTGRHAPHSRSHGSIKRDMDT---NHRHQPFSIRIRNESGKTLVANNVIPANRHPDVAVYTSNVQFY  
AF332181\_ZnEXPB8 RGPPTGRHAPHSRSHGSIKRDMDT---NHRHQPFSIRIRNESGKTLVANNVIPANRHPDVAVYTSNVQFY  
AF332176\_ZnEXPB3 DGEPTGVHAPHSRSHGSIKRDMDT---RRPLQGPFSIRIRNESGKTLVANNVIPANRHPDVAVYTSNVQFY  
AF332178\_ZnEXPB5 ---SGYHAPHSRSHGSIKRDMDT---NHRHQPFSIRIRNESGKTLVANNVIPANRHPDVAVYTSNVQFY  
AF332180\_ZnEXPB7 ---SGYHAPHSRSHGSIKRDMDT---NHRHQPFSIRIRNESGKTLVANNVIPANRHPDVAVYTSNVQFY  
TC280520\_ZnEXPB14 ---SGYHAPHSRSHGSIKRDMDT---NHRHQPFSIRIRNESGKTLVANNVIPANRHPDVAVYTSNVQFY  
TC280521\_ZnEXPB13 ---SGYHAPHSRSHGSIKRDMDT---NHRHQPFSIRIRNESGKTLVANNVIPANRHPDVAVYTSNVQFY  
AF332179\_ZnEXPB6 ---SGYHAPHSRSHGSIKRDMDT---NHRHQPFSIRIRNESGKTLVANNVIPANRHPDVAVYTSNVQFY  
TC310578\_ZnEXPB18 ---SGYHAPHSRSHGSIKRDMDT---NHRHQPFSIRIRNESGKTLVANNVIPANRHPDVAVYTSNVQFY  
AF332177\_ZnEXPB4 ---VHTPHANNHGAIRKMDT---GRKLKAPFSLRL TSDSRVLAANNVIPANRHPDVAVYTSNVQFY  
TC287648\_ZnEXPB12 ---CG---THTPHANNHGAIRKMDT---GRKLKAPFSLRL TSDSRVLAANNVIPANRHPDVAVYTSNVQFY  
TC287642\_ZnEXPB19 ---CG---THTPHANNHGAIRKMDT---GRKLKAPFSLRL TSDSRVLAANNVIPANRHPDVAVYTSNVQFY  
TC311993\_ZnEXPB15 ---GG---GAMPHQSHGAIKRDSD---GDLQAPFSVRL TSGSRTVVASNVIPAGHTPGATYRSVNVFDM--N  
TC289097\_ZnEXPB16 ---GGTIGQVPHQSHGAIKRDSD---GDLQAPFSVRL TSGSRTVVASNVIPAGHTPGATYRSVNVFDM--N  
B6873846\_ZnEXPB22 TGKPTGVHTPHANNHGAIRKMDT---APRHQAP  
TC310589\_ZnEXPB20 ---ARRHTPHNSHGSIRKMDT---NHRHQPFSIRIRNESGKTLVANNVIPANRHPDVAVYTSNVQFY  
TC308380\_ZnEXPB21 ---AGQVPHQSHGAIKRDSD---GDLQAPFSVRL TSGSRTVVASNVIPAGHTPGATYRSVNVFDM--N  
TC311991\_ZnEXPB17 ARRSAAHAPHSRSHGAIKRDSD---GDLQAPFSVRL TSGSRTVVASNVIPAGHTPGATYRSVNVFDM--N  
Consensus .....g.H.N..SHGa!wr.ds ...lqgPfs.r.lc...sg..lva..vipa.u.p...urs.v.....
