# Supplementary material
Source: PubMed Central journal article supplement (PMC1761972)
Supplement: plntphys_pp.106.087494_4.pdf [file plntphys_pp.106.087494_4.pdf]

## SUPPLEMENTAL FIGURE LEGENDS

**Suppl. Figure 1.** Comparison of gel-PCR with real-time PCR for a selection of 6 EXPA or EXPB in successive 2 cm long segments at the base of maize leaves. All tissues were collected from well watered F-2 line. Gene names are indicated in each panel. Maximum expression was set to 1. Real-time expression data are means of two technical replicates and two independent samples. In F are shown the results of independent experiments performed at three occasions.

**Suppl. Figure 2.** Top : List of maize  $\alpha$ -Expansins genes and putative genes studied with corresponding names, GB# of assembled ESTs and genomic DNA. Bottom : Alignement of translated sequences.

**Suppl. Figure 3.** Top : List of maize  $\beta$ -Expansins genes and putative genes studied with corresponding names, GB# of assembled ESTs and genomic DNA. Bottom : Alignement of translated sequences.
