# Supplementary material
Source: PubMed Central journal article supplement (PMC1761972)

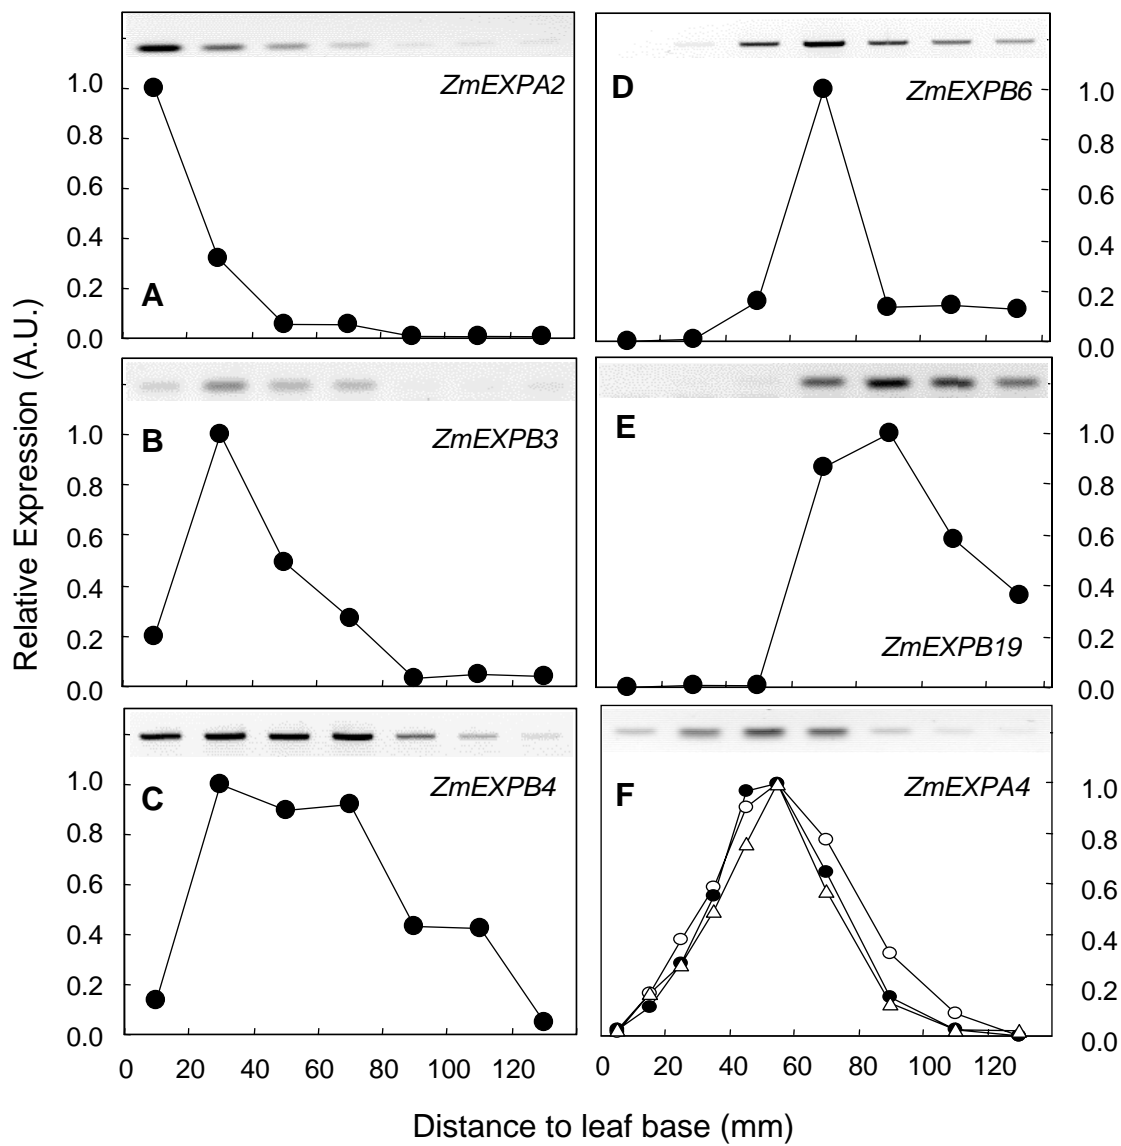

Supplement: plntphys_pp.106.087494_1.pdf [file plntphys_pp.106.087494_1.pdf]
